# Supplementary material
Source: publisher site journal article supplement (https://zookeys.pensoft.net/article/66645/download/suppl/31/)

## Supplementary information

### Morphological and molecular data on tadpoles of the westernmost Himalayan spiny frog *Allopaia hazarensis* (Dubois and Khan, 1979)

Sylvia Hofmann, Rafaqat Masroor, Daniel Jablonski

**Table S1.** List of *Allopaia hazarensis* specimens used in the present study (indicated bold) and previous work, as shown in Fig. 1, including sample ID or voucher number, and sample localities. The holotype is marked with an asterisk. Coordinates are given in decimal degrees. ZFMK = Zoological Research Museum Alexander Koenig, Bonn, Germany

| ID/No              | Locality                               | N       | E       | Altitude |
|--------------------|----------------------------------------|---------|---------|----------|
| <b>ZFMK 103351</b> | Qadir Nagar, Buner, Khyber, Pakistan   | 34.6401 | 72.4716 | 935      |
| ZFMK 103352        | Buner, Khyber, Pakistan                | 34.6564 | 72.4961 | 1520     |
| <b>ZFMK 103353</b> | Buner, Khyber, Pakistan                | 34.6564 | 72.4961 | 1520     |
| <b>ZFMK 103354</b> | Buner, Khyber, Pakistan                | 34.6564 | 72.4961 | 1520     |
| ZFMK 103387        | near Murree, Pakistan                  | 33.8596 | 73.4701 | 1638     |
| ZFMK 103388        | near Murree, Pakistan                  | 33.8596 | 73.4701 | 1638     |
| 9386               | Datta, Manshera, Pakistan              | 34.2950 | 73.2580 | 1300     |
| 9389               | Datta, Manshera, Pakistan              | 34.2950 | 73.2580 | 1300     |
| 9549               | Aliot, Pakistan                        | 33.9510 | 73.4680 | 1511     |
| 9551               | Margi, Pakistan                        | 33.9400 | 73.4650 | 1618     |
| 9559               | Laram Qilla, Lower Dir, Pakistan       | 34.7850 | 71.9860 | 1436     |
| 9573               | Laram Qilla, Lower Dir, Pakistan       | 34.7850 | 71.9860 | 1436     |
| 1978.3056*         | near Datta, Manshera, Hazera, Pakistan | 34.2500 | 73.2500 | 1200     |

**Table S2.** Measurements (in mm) and counts of voucher specimens (V-ID) of tadpole series of *Allopaa hazarensis* deposited at the Zoological Research Museum Alexander Koenig, Bonn, Germany. TL: total length; BL: body length; TAL: tail length; TMW: tail muscle width at tail base; IOD: interorbital distance; TMH: tail muscle height at tail base; IND: internarial distance; EN: eye-nostril distance; OWD: oral disc width.

| V-ID   | TL   | BL   | TAL  | TMH | TMW | IOD | IND | EN  | ODW | LTRF          |
|--------|------|------|------|-----|-----|-----|-----|-----|-----|---------------|
| 103351 | 61.6 | 19.8 | 41.8 | 7.0 | 5.9 | 5.6 | 3.4 | 4.0 | 6.3 | 7(2-7)/3(1)   |
| 103353 | 76.5 | 25.3 | 51.2 | 8.1 | 7.6 | 8.2 | 4.3 | 5.0 | 7.9 | 8(2-8)/3(1)   |
| 105554 | 73.2 | 22.8 | 50.4 | 6.8 | 7.0 | 7.4 | 4.5 | 4.7 | 8.2 | 8(2-8)/3(1,3) |

**Figure S1.** Maximum-likelihood tree based on concatenated mtDNA and nuDNA sequence data. Branch nodes supported by bootstrap values >75 are marked with a small rectangle. In the *Allopaia* clade species name is followed by specimen ID in brackets; IDs of the two tadpoles deposited at the Zoological Research Museum Alexander Koenig, Bonn, Germany and described herein are in bold.

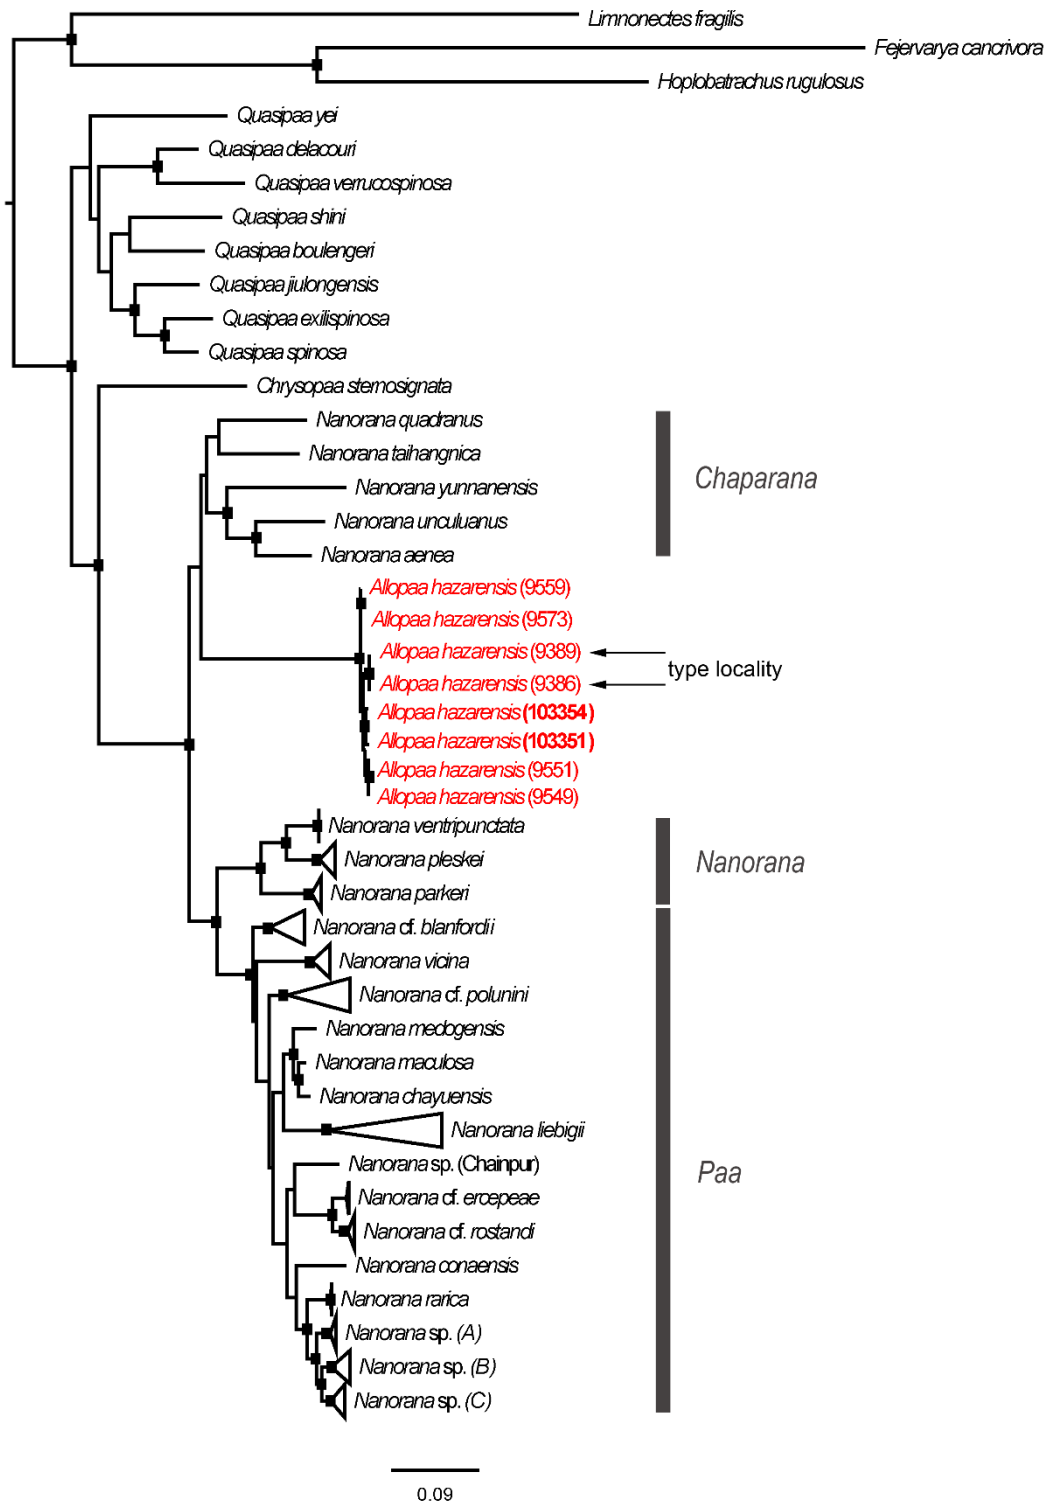

**Figure S2.** Tadpole (ZFMK 103351; Gosner stage 26) of *Allopaa hazarensis* from Buner, Khyber, Pakistan, 935 m; dorsal, lateral, and ventral view.

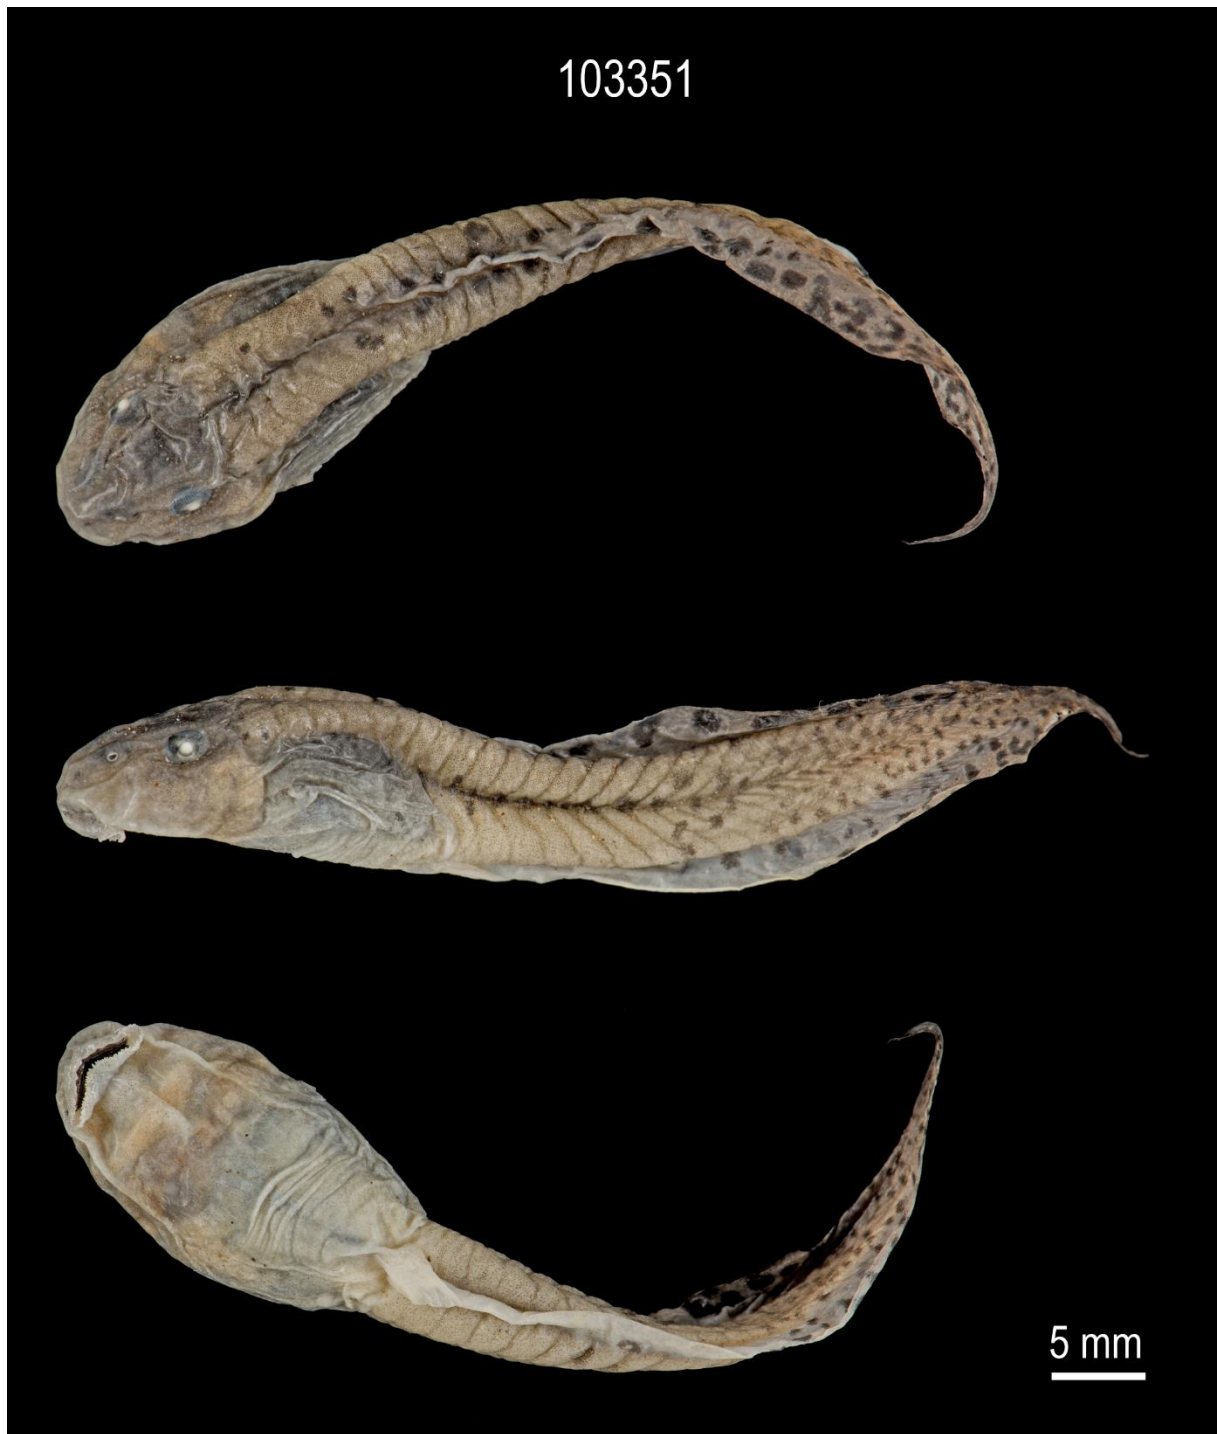

Supplement: Supplementary file
